# Supplementary material for: Seed interior microbiome of rice genotypes indigenous to three agroecosystems of Indo-Burma biodiversity hotspot
Source: PubMed Central journal article supplement (PMC6892021; doi:10.1186/s12864-019-6334-5), 2019-12-03
Supplement: 12864_2019_6334_MOESM1_ESM.pdf [file 12864_2019_6334_MOESM1_ESM.pdf]

**TABLE S1. Number of colony forming units in each replicate of the seven culture media across the seven genotypes and statistical analysis.**

|           |         | CFU per replicate |     |     |          |                     |        |        |        |      |         |           |
|-----------|---------|-------------------|-----|-----|----------|---------------------|--------|--------|--------|------|---------|-----------|
| Genotype  | media   | R1                | R2  | R3  | mean CFU | CFU/g dry seed      | Log R1 | Log R2 | Log R3 | Mean | Std dev | Std error |
| Idaw      | R2A-CMC | 272               | 291 | 295 | 286      | 2.8x10 <sup>6</sup> | 6.43   | 6.46   | 6.47   | 6.45 | 0.02    | 0.012     |
|           | JA      | 170               | 160 | 135 | 155      | 1.5x10 <sup>5</sup> | 5.23   | 5.20   | 5.13   | 5.19 | 0.05    | 0.030     |
|           | R2A-PEC | 1                 | 1   | 1   | 1        | 1.0x10 <sup>3</sup> | 3.00   | 3.00   | 3.00   | 3.00 | 0.00    | 0.000     |
|           | NA      | 280               | 260 | 270 | 270      | 2.7x10 <sup>5</sup> | 5.45   | 5.41   | 5.43   | 5.43 | 0.02    | 0.012     |
|           | SCDA    | 150               | 142 | 143 | 145      | 1.4x10 <sup>7</sup> | 7.18   | 7.15   | 7.15   | 7.16 | 0.02    | 0.010     |
|           | R2A     | 137               | 123 | 124 | 128      | 1.2x10 <sup>6</sup> | 6.14   | 6.10   | 6.10   | 6.11 | 0.02    | 0.013     |
| Kekua Bao | NA      | 297               | 224 | 289 | 270      | 2.7X10 <sup>7</sup> | 7.47   | 7.35   | 7.46   | 7.43 | 0.07    | 0.038     |
|           | SCDA    | 188               | 225 | 211 | 208      | 2.0X10 <sup>7</sup> | 7.27   | 7.35   | 7.32   | 7.31 | 0.04    | 0.023     |
|           | PKA     | 84                | 96  | 90  | 90       | 9.0X10 <sup>6</sup> | 6.92   | 6.98   | 6.95   | 6.95 | 0.03    | 0.017     |
|           | R2A-CMC | 226               | 186 | 266 | 226      | 2.2X10 <sup>7</sup> | 7.35   | 7.27   | 7.42   | 7.35 | 0.08    | 0.043     |
|           | R2A     | 215               | 197 | 233 | 215      | 2.1X10 <sup>7</sup> | 7.33   | 7.30   | 7.40   | 7.34 | 0.05    | 0.030     |
|           | JA      | 182               | 205 | 159 | 182      | 1.8X10 <sup>7</sup> | 7.30   | 7.31   | 7.20   | 7.27 | 0.06    | 0.035     |
| Fazai     | R2A-PEC | 97                | 97  | 97  | 97       | 9.7X10 <sup>5</sup> | 5.99   | 5.99   | 5.99   | 5.99 | 0.00    | 0.000     |
|           | R2A     | 100               | 95  | 99  | 98       | 9.8x10 <sup>5</sup> | 6.00   | 5.98   | 5.99   | 5.99 | 0.01    | 0.006     |
|           | SCDA    | 95                | 91  | 87  | 91       | 9.1x10 <sup>5</sup> | 5.98   | 5.96   | 5.94   | 5.96 | 0.02    | 0.012     |

|                   |         |     |     |     |     |                      |      |      |      |      |      |       |
|-------------------|---------|-----|-----|-----|-----|----------------------|------|------|------|------|------|-------|
|                   | R2A-CMC | 107 | 86  | 86  | 93  | 9.3x10 <sup>5</sup>  | 6.03 | 5.93 | 5.93 | 5.96 | 0.06 | 0.033 |
|                   | PKA     | 61  | 57  | 65  | 61  | 6.1x10 <sup>5</sup>  | 5.78 | 5.76 | 5.81 | 5.78 | 0.03 | 0.015 |
|                   | JA      | 3   | 3   | 3   | 3   | 3.0x10 <sup>4</sup>  | 4.48 | 4.48 | 4.48 | 4.48 | 0.00 | 0.000 |
|                   | NA      | 70  | 73  | 76  | 73  | 7.3x10 <sup>5</sup>  | 5.84 | 5.90 | 5.90 | 5.88 | 0.03 | 0.020 |
| <b>Ranjit</b>     | NA      | mat | 16  | 12  | 14  | 1.4x10 <sup>4</sup>  | 4.00 | 4.20 | 4.18 | 4.13 | 0.11 | 0.064 |
|                   | R2A     | 1   | 1   | 1   | 1   | 1.0x10 <sup>4</sup>  | 4.00 | 4.00 | 4.00 | 4.00 | 0.00 | 0.000 |
|                   | JA      | 69  | 75  | 63  | 69  | 6.9x10 <sup>4</sup>  | 4.84 | 4.87 | 4.80 | 4.84 | 0.04 | 0.020 |
|                   | SCDA    | 173 | 147 | 145 | 155 | 1.55x10 <sup>5</sup> | 5.24 | 5.27 | 5.20 | 5.24 | 0.04 | 0.020 |
|                   | PKA     | 10  | 17  | 12  | 13  | 1.3x10 <sup>4</sup>  | 4.00 | 4.23 | 4.10 | 4.11 | 0.12 | 0.067 |
|                   | R2A-PEC | 1   | 3   | 2   | 2   | 2.0x10 <sup>3</sup>  | 3.00 | 3.58 | 3.30 | 3.29 | 0.29 | 0.167 |
|                   | R2A-CMC | 16  | 25  | 19  | 20  | 2.0x10 <sup>4</sup>  | 4.20 | 4.49 | 4.38 | 4.36 | 0.15 | 0.085 |
| <b>Taiklwangh</b> | NA      | 293 | 289 | 306 | 296 | 2.96x10 <sup>5</sup> | 5.57 | 5.50 | 5.59 | 5.55 | 0.05 | 0.027 |
|                   | R2A-CMC | 228 | 235 | 221 | 228 | 2.2x10 <sup>5</sup>  | 5.36 | 5.37 | 5.34 | 5.36 | 0.02 | 0.009 |
|                   | R2A-PEC | 171 | 165 | 159 | 165 | 1.6x10 <sup>5</sup>  | 5.23 | 5.22 | 5.20 | 5.22 | 0.02 | 0.009 |
|                   | R2A     | 102 | 105 | 99  | 102 | 1.02x10 <sup>5</sup> | 5.01 | 5.02 | 4.99 | 5.01 | 0.02 | 0.009 |
|                   | SCDA    | 221 | 219 | 211 | 217 | 2.17x10 <sup>5</sup> | 5.34 | 5.34 | 5.32 | 5.33 | 0.01 | 0.007 |
|                   | PKA     | 243 | 235 | 227 | 235 | 2.35x10 <sup>5</sup> | 5.39 | 5.37 | 5.36 | 5.37 | 0.02 | 0.009 |
|                   | JA      | 253 | 231 | mat | 242 | 2.42x10 <sup>5</sup> | 5.40 | 5.36 | 5.00 | 5.25 | 0.22 | 0.127 |
| <b>Kalajoha</b>   | R2A-CMC | 11  | 10  | 9   | 10  | 1.0x10 <sup>4</sup>  | 4.04 | 4.00 | 3.95 | 4.00 | 0.05 | 0.026 |
|                   | PKA     | 1   | 1   | 1   | 1   | 1.0x10 <sup>3</sup>  | 3.00 | 3.00 | 3.00 | 3.00 | 0.00 | 0.000 |
|                   | R2A     | 3   | 3   | 3   | 3   | 3.0x10 <sup>3</sup>  | 3.48 | 3.48 | 3.48 | 3.48 | 0.00 | 0.000 |

|                   |         |     |     |     |      |                    |      |      |      |      |      |       |
|-------------------|---------|-----|-----|-----|------|--------------------|------|------|------|------|------|-------|
|                   | NA      | 11  | 13  | 15  | 13   | $1.3 \times 10^6$  | 6.04 | 6.11 | 6.18 | 6.11 | 0.07 | 0.040 |
|                   | SCDA    | 1   | 1   | 1   | 1    | $1.0 \times 10^3$  | 3.00 | 3.00 | 3.00 | 3.00 | 0.00 | 0.000 |
|                   | R2A-PEC | 2   | 1   | 2   | 1.7  | $1.7 \times 10^3$  | 3.30 | 3.00 | 3.30 | 3.20 | 0.17 | 0.100 |
|                   | JA      | 180 | 200 | 220 | 200  | $2.0 \times 10^5$  | 5.25 | 5.30 | 5.34 | 5.30 | 0.05 | 0.026 |
| <b>Maguri bao</b> | NA      | 97  | 95  | 93  | 95   | $9.5 \times 10^8$  | 8.99 | 8.98 | 8.97 | 8.98 | 0.01 | 0.006 |
|                   | R2A     | 84  | 87  | 89  | 86.7 | $8.67 \times 10^8$ | 8.92 | 8.94 | 8.95 | 8.94 | 0.02 | 0.009 |
|                   | JA      | 58  | 10  | 34  | 34   | $3.4 \times 10^8$  | 8.76 | 8.00 | 8.53 | 8.43 | 0.39 | 0.225 |
|                   | SCDA    | 69  | 70  | 68  | 69   | $6.9 \times 10^8$  | 8.84 | 8.85 | 8.83 | 8.84 | 0.01 | 0.006 |
|                   | PKA     | 81  | 26  | 57  | 54.7 | $5.47 \times 10^8$ | 8.91 | 8.41 | 8.76 | 8.69 | 0.26 | 0.148 |
|                   | R2A-PEC | 45  | 55  | 47  | 49   | $4.9 \times 10^8$  | 8.65 | 8.74 | 8.67 | 8.69 | 0.05 | 0.027 |
|                   | R2A-CMC | 87  | 86  | 75  | 82.7 | $8.27 \times 10^8$ | 8.94 | 8.93 | 8.88 | 8.92 | 0.03 | 0.019 |
