# Supplementary material for: Seed interior microbiome of rice genotypes indigenous to three agroecosystems of Indo-Burma biodiversity hotspot
Source: PubMed Central journal article supplement (PMC6892021; doi:10.1186/s12864-019-6334-5), 2019-12-03
Supplement: 12864_2019_6334_MOESM3_ESM.pdf [file 12864_2019_6334_MOESM3_ESM.pdf]

**Table S3: Next generation sequencing based OTUs of endophytic bacteria at different taxa and percentage abundance of unaassigned OTUs**

| Genotype and total no. of phyla | Diversity at different taxa level        |               |                                                                                                                                                                                                                            |                              | Unassigned OTU abundance (%) |
|---------------------------------|------------------------------------------|---------------|----------------------------------------------------------------------------------------------------------------------------------------------------------------------------------------------------------------------------|------------------------------|------------------------------|
|                                 | Dominant phylum (relative abundance >3%) | Abundance (%) | Dominant genera within the phylum (relative abundance >0.7%)                                                                                                                                                               | Number of identified species |                              |
| Idaw                            | <i>Proteobacteria</i>                    | 85.31         | <i>Achromobacter</i> (17.02), <i>Erwinia</i> (12.99), <i>Xanthomonas</i> (10.72), <i>Pseudomonas</i> (9.06), <i>Agrobacterium</i> (6.97), <i>Ochrobactrum</i> (6.87), <i>Stenotrophomonas</i> (0.78)                       | 65                           | 43.44                        |
|                                 | <i>Actinobacteria</i>                    | 5.98          | <i>Bifidobacterium</i> (1.2), <i>Propionibacterium</i> (1.1)                                                                                                                                                               |                              |                              |
|                                 | <i>Firmicutes</i>                        | 5.18          | <i>Faecalibacterium</i> (1.2)                                                                                                                                                                                              |                              |                              |
|                                 | <i>Bacteroidetes</i>                     | 2.39          | <i>Bacteroides</i> (0.99)                                                                                                                                                                                                  |                              |                              |
| Taiklwangh                      | <i>Proteobacteria</i>                    | 75.88         | <i>Achromobacter</i> (16.0), <i>Erwinia</i> (32.3), <i>Xanthomonas</i> (1.5), <i>Pseudomonas</i> (6.1), <i>Agrobacterium</i> (6.5), <i>Ochrobactrum</i> (6.6), <i>Stenotrophomonas</i> (0.89), <i>Enhydrobacter</i> (0.99) | 62                           | 21.92                        |
|                                 | <i>Actinobacteria</i>                    | 8.33          | <i>Bifidobacterium</i> (6.1), <i>Propionibacterium</i> (0.82)                                                                                                                                                              |                              |                              |
|                                 | <i>Firmicutes</i>                        | 9.95          | <i>Faecalibacterium</i> (2.2)                                                                                                                                                                                              |                              |                              |
|                                 | <i>Bacteroidetes</i>                     | 4.41          | <i>Bacteroides</i> (3.0)                                                                                                                                                                                                   |                              |                              |
| Fazai                           | <i>Proteobacteria</i>                    | 52.10         | <i>Achromobacter</i> (0.78), <i>Erwinia</i> (11.3), <i>Pseudomonas</i> (14.9), <i>Agrobacterium</i> (0.88), <i>Ochrobactrum</i> (0.87), <i>Stenotrophomonas</i> (0.71), <i>Enhydrobacter</i> (1.9)                         | 45                           | 29.18                        |
|                                 | <i>Actinobacteria</i>                    | 9.56          | <i>Bifidobacterium</i> (2.2), <i>Propionibacterium</i> (2.3)                                                                                                                                                               |                              |                              |
|                                 | <i>Firmicutes</i>                        | 20.35         | <i>Faecalibacterium</i> (2.2)                                                                                                                                                                                              |                              |                              |
|                                 | <i>Bacteroidetes</i>                     | 16.61         | <i>Bacteroides</i> (0.97)                                                                                                                                                                                                  |                              |                              |
| Ranjit                          | <i>Proteobacteria</i>                    | 86.75         | <i>Erwinia</i> (33.7), <i>Xanthomonas</i> (12.4), <i>Pseudomonas</i> (9.0), <i>Agrobacterium</i> (10.4), <i>Enhydrobacter</i> (0.74)                                                                                       | 46                           | 30.64                        |
|                                 | <i>Actinobacteria</i>                    | 6.32          | <i>Propionibacterium</i> (0.70)                                                                                                                                                                                            |                              |                              |
|                                 | <i>Firmicutes</i>                        | 3.50          |                                                                                                                                                                                                                            |                              |                              |
|                                 | <i>Bacteroidetes</i>                     | 3.07          |                                                                                                                                                                                                                            |                              |                              |
| Kalajoha                        | <i>Proteobacteria</i>                    | 84.62         | <i>Achromobacter</i> (11.7), <i>Erwinia</i> (21.6), <i>Xanthomonas</i> (10.3), <i>Pseudomonas</i> (12.5), <i>Agrobacterium</i> (7.8), <i>Ochrobactrum</i> (4.5), <i>Stenotrophomonas</i> (0.74)                            | 59                           | 29.51                        |
|                                 | <i>Actinobacteria</i>                    | 6.63          | <i>Bifidobacterium</i> (0.71)                                                                                                                                                                                              |                              |                              |
|                                 | <i>Firmicutes</i>                        | 3.35          | <i>Faecalibacterium</i> (0.75)                                                                                                                                                                                             |                              |                              |
|                                 | <i>Bacteroidetes</i>                     | 4.62          | <i>Bacteroides</i> (0.84)                                                                                                                                                                                                  |                              |                              |
| Maguri bao                      | <i>Proteobacteria</i>                    | 72.03         | <i>Achromobacter</i> (34.3), <i>Pseudomonas</i> (8.4), <i>Agrobacterium</i> (4.4), <i>Ochrobactrum</i> (14.0), <i>Stenotrophomonas</i> (1.5), <i>Enhydrobacter</i> (1.0)                                                   | 60                           | 19.79                        |
|                                 | <i>Actinobacteria</i>                    | 7.81          | <i>Bifidobacterium</i> (2.2), <i>Propionibacterium</i> (1.7)                                                                                                                                                               |                              |                              |
|                                 | <i>Firmicutes</i>                        | 11.02         | <i>Faecalibacterium</i> (1.3)                                                                                                                                                                                              |                              |                              |
|                                 | <i>Bacteroidetes</i>                     | 5.82          | <i>Bacteroides</i> (2.4)                                                                                                                                                                                                   |                              |                              |
| Kekua bao                       | <i>Proteobacteria</i>                    | 87.77         | <i>Achromobacter</i> (13.9), <i>Erwinia</i> (19.5), <i>Xanthomonas</i> (9.8), <i>Pseudomonas</i> (24.9), <i>Agrobacterium</i> (3.8), <i>Ochrobactrum</i> (5.4), <i>Enhydrobacter</i> (0.78)                                | 59                           | 43.1                         |
|                                 | <i>Actinobacteria</i>                    | 3.39          | <i>Propionibacterium</i> (0.89), <i>Bifidobacterium</i> (1.0)                                                                                                                                                              |                              |                              |
|                                 | <i>Firmicutes</i>                        | 5.58          | <i>Faecalibacterium</i> (466)                                                                                                                                                                                              |                              |                              |
|                                 | <i>Bacteroidetes</i>                     | 2.41          | <i>Bacteroides</i> (1.3)                                                                                                                                                                                                   |                              |                              |
