# Supplementary material for: Seed interior microbiome of rice genotypes indigenous to three agroecosystems of Indo-Burma biodiversity hotspot
Source: PubMed Central journal article supplement (PMC6892021; doi:10.1186/s12864-019-6334-5), 2019-12-03
Supplement: 12864_2019_6334_MOESM4_ESM.pdf [file 12864_2019_6334_MOESM4_ESM.pdf]

**Table S4: Range of three alpha diversity indices in the seven rice genotypes**

| <b>Genotype</b> | <b>Observed OTUs</b> | <b>InvSimpson</b> | <b>Chao1</b>  |
|-----------------|----------------------|-------------------|---------------|
| Idaw            | 352-819              | 3.51-18.94        | 548.9-1090.4  |
| Taiklwangh      | 330-635              | 10.89-29.05       | 449.7-915.1   |
| Fanai           | 87-334               | 9.31-68.16        | 99.8-425.9    |
| Ranjit          | 90-457               | 8.33-46.06        | 137.1-619.0   |
| Kalajoha        | 175-629              | 9.58-20.64        | 261.4-874.1   |
| Maguri bao      | 276-423              | 9.67-17.64        | 389.56-666.95 |
| Kekua bao       | 287-478              | 5.04-20.77        | 397.3-654.4   |
