# Supplementary material for: Seed interior microbiome of rice genotypes indigenous to three agroecosystems of Indo-Burma biodiversity hotspot
Source: PubMed Central journal article supplement (PMC6892021; doi:10.1186/s12864-019-6334-5), 2019-12-03
Supplement: 12864_2019_6334_MOESM5_ESM.pdf [file 12864_2019_6334_MOESM5_ESM.pdf]

Table S5: List of OTUs detected in all the hills of a genotype

| Host genotype            | Core OTUs                |                                |                             |                                |                              |                           | Total OTUs<br>across 100%<br>of sample |
|--------------------------|--------------------------|--------------------------------|-----------------------------|--------------------------------|------------------------------|---------------------------|----------------------------------------|
| Idaw (n=8)               | <i>p__Actinobacteria</i> | <i>c__Actinobacteria</i>       | <i>o__Bifidobacteriales</i> | <i>f__Bifidobacteriaceae</i>   | <i>g__Bifidobacterium</i>    | <i>s__adolescentis</i>    | 49                                     |
|                          | <i>p__Actinobacteria</i> | <i>c__Actinobacteria</i>       | <i>o__Bifidobacteriales</i> | <i>f__Bifidobacteriaceae</i>   | <i>g__Bifidobacterium</i>    | <i>s__</i>                |                                        |
|                          | <i>p__Actinobacteria</i> | <i>c__Actinobacteria</i>       | <i>o__Actinomycetales</i>   | <i>f__Propionibacteriaceae</i> | <i>g__Propionibacterium</i>  | <i>s__acnes</i>           |                                        |
|                          | <i>p__Firmicutes</i>     | <i>c__Clostridia</i>           | <i>o__Clostridiales</i>     | <i>f__Ruminococcaceae</i>      | <i>g__Faecalibacterium</i>   | <i>s__prausnitzii</i>     |                                        |
|                          | <i>p__Proteobacteria</i> | <i>c__Gammmaproteobacteria</i> | <i>o__Xanthomonadales</i>   | <i>f__Xanthomonadaceae</i>     | <i>g__</i>                   | <i>s__</i>                |                                        |
|                          | <i>p__Proteobacteria</i> | <i>c__Gammmaproteobacteria</i> | <i>o__Enterobacteriales</i> | <i>f__Enterobacteriaceae</i>   | <i>g__</i>                   | <i>s__</i>                |                                        |
|                          | <i>p__Proteobacteria</i> | <i>c__Betaproteobacteria</i>   | <i>o__Burkholderiales</i>   | <i>f__Alcaligenaceae</i>       | <i>g__</i>                   | <i>s__</i>                |                                        |
|                          | <i>p__Proteobacteria</i> | <i>c__Betaproteobacteria</i>   | <i>o__Burkholderiales</i>   | <i>f__Alcaligenaceae</i>       | <i>g__Achromobacter</i>      | <i>s__</i>                |                                        |
|                          | <i>p__Proteobacteria</i> | <i>c__Alphaproteobacteria</i>  | <i>o__Rhizobiales</i>       | <i>f__Rhizobiaceae</i>         | <i>g__Agrobacterium</i>      | <i>s__</i>                |                                        |
|                          | <i>p__Proteobacteria</i> | <i>c__Betaproteobacteria</i>   | <i>o__Burkholderiales</i>   | <i>f__Comamonadaceae</i>       | <i>g__Delftia</i>            | <i>s__</i>                |                                        |
|                          | <i>p__Proteobacteria</i> | <i>c__Gammmaproteobacteria</i> | <i>o__Pseudomonadales</i>   | <i>f__Moraxellaceae</i>        | <i>g__Enhydrobacter</i>      | <i>s__</i>                |                                        |
|                          | <i>p__Proteobacteria</i> | <i>c__Gammmaproteobacteria</i> | <i>o__Enterobacteriales</i> | <i>f__Enterobacteriaceae</i>   | <i>g__Enterobacter</i>       | <i>s__</i>                |                                        |
|                          | <i>p__Proteobacteria</i> | <i>c__Gammmaproteobacteria</i> | <i>o__Enterobacteriales</i> | <i>f__Enterobacteriaceae</i>   | <i>g__Erwinia</i>            | <i>s__</i>                |                                        |
|                          | <i>p__Proteobacteria</i> | <i>c__Alphaproteobacteria</i>  | <i>o__Rhizobiales</i>       | <i>f__Brucellaceae</i>         | <i>g__Ochrobactrum</i>       | <i>s__</i>                |                                        |
|                          | <i>p__Proteobacteria</i> | <i>c__Gammmaproteobacteria</i> | <i>o__Pseudomonadales</i>   | <i>f__Pseudomonadaceae</i>     | <i>g__Pseudomonas</i>        | <i>s__</i>                |                                        |
|                          | <i>p__Proteobacteria</i> | <i>c__Gammmaproteobacteria</i> | <i>o__Pseudomonadales</i>   | <i>f__Pseudomonadaceae</i>     | <i>g__Pseudomonas</i>        | <i>s__viridiflava</i>     |                                        |
|                          | <i>p__Proteobacteria</i> | <i>c__Alphaproteobacteria</i>  | <i>o__Sphingomonadales</i>  | <i>f__Sphingomonadaceae</i>    | <i>g__Sphingomonas</i>       | <i>s__</i>                |                                        |
|                          | <i>p__Proteobacteria</i> | <i>c__Gammmaproteobacteria</i> | <i>o__Xanthomonadales</i>   | <i>f__Xanthomonadaceae</i>     | <i>g__Stenotrophomonas</i>   | <i>s__</i>                |                                        |
|                          | <i>p__Proteobacteria</i> | <i>c__Alphaproteobacteria</i>  | <i>o__Rhizobiales</i>       |                                |                              |                           |                                        |
|                          | Taikwangh (n=8)          | <i>p__Actinobacteria</i>       | <i>c__Actinobacteria</i>    | <i>o__Bifidobacteriales</i>    | <i>f__Bifidobacteriaceae</i> | <i>g__Bifidobacterium</i> |                                        |
| <i>p__Actinobacteria</i> |                          | <i>c__Actinobacteria</i>       | <i>o__Bifidobacteriales</i> | <i>f__Bifidobacteriaceae</i>   | <i>g__Bifidobacterium</i>    | <i>s__</i>                |                                        |
| <i>p__Actinobacteria</i> |                          | <i>c__Actinobacteria</i>       | <i>o__Actinomycetales</i>   | <i>f__Corynebacteriaceae</i>   | <i>g__Corynebacterium</i>    | <i>s__</i>                |                                        |
| <i>p__Actinobacteria</i> |                          | <i>c__Actinobacteria</i>       | <i>o__Actinomycetales</i>   | <i>f__Propionibacteriaceae</i> | <i>g__Propionibacterium</i>  | <i>s__acnes</i>           |                                        |
| <i>p__Bacteroidetes</i>  |                          | <i>c__Bacteroidia</i>          | <i>o__Bacteroidales</i>     | <i>f__Bacteroidaceae</i>       | <i>g__Bacteroides</i>        | <i>s__</i>                |                                        |
| <i>p__Firmicutes</i>     |                          | <i>c__Bacilli</i>              | <i>o__Turicibacterales</i>  | <i>f__Turicibacteraceae</i>    | <i>g__Turicibacter</i>       | <i>s__</i>                |                                        |
| <i>p__Proteobacteria</i> |                          | <i>c__Gammmaproteobacteria</i> | <i>o__Xanthomonadales</i>   | <i>f__Xanthomonadaceae</i>     | <i>g__</i>                   | <i>s__</i>                |                                        |
| <i>p__Proteobacteria</i> |                          | <i>c__Betaproteobacteria</i>   | <i>o__Burkholderiales</i>   | <i>f__Alcaligenaceae</i>       | <i>g__</i>                   | <i>s__</i>                |                                        |
| <i>p__Proteobacteria</i> |                          | <i>c__Gammmaproteobacteria</i> | <i>o__Enterobacteriales</i> | <i>f__Enterobacteriaceae</i>   | <i>g__</i>                   | <i>s__</i>                |                                        |
| <i>p__Proteobacteria</i> |                          | <i>c__Betaproteobacteria</i>   | <i>o__Burkholderiales</i>   | <i>f__Alcaligenaceae</i>       | <i>g__Achromobacter</i>      | <i>s__</i>                |                                        |
| <i>p__Proteobacteria</i> |                          | <i>c__Alphaproteobacteria</i>  | <i>o__Rhizobiales</i>       | <i>f__Rhizobiaceae</i>         | <i>g__Agrobacterium</i>      | <i>s__</i>                |                                        |
| <i>p__Proteobacteria</i> |                          | <i>c__Betaproteobacteria</i>   | <i>o__Burkholderiales</i>   | <i>f__Comamonadaceae</i>       | <i>g__Comamonas</i>          | <i>s__</i>                |                                        |
| <i>p__Proteobacteria</i> |                          | <i>c__Gammmaproteobacteria</i> | <i>o__Pseudomonadales</i>   | <i>f__Moraxellaceae</i>        | <i>g__Enhydrobacter</i>      | <i>s__</i>                |                                        |
| <i>p__Proteobacteria</i> |                          | <i>c__Gammmaproteobacteria</i> | <i>o__Enterobacteriales</i> | <i>f__Enterobacteriaceae</i>   | <i>g__Erwinia</i>            | <i>s__</i>                |                                        |
| <i>p__Proteobacteria</i> |                          | <i>c__Alphaproteobacteria</i>  | <i>o__Rhizobiales</i>       | <i>f__Phyllobacteriaceae</i>   | <i>g__Mesorhizobium</i>      | <i>s__</i>                |                                        |
| <i>p__Proteobacteria</i> |                          | <i>c__Alphaproteobacteria</i>  | <i>o__Rhizobiales</i>       | <i>f__Brucellaceae</i>         | <i>g__Ochrobactrum</i>       | <i>s__</i>                |                                        |
| <i>p__Proteobacteria</i> |                          | <i>c__Gammmaproteobacteria</i> | <i>o__Pseudomonadales</i>   | <i>f__Pseudomonadaceae</i>     | <i>g__Pseudomonas</i>        | <i>s__</i>                |                                        |
| <i>p__Proteobacteria</i> |                          | <i>c__Gammmaproteobacteria</i> | <i>o__Pseudomonadales</i>   | <i>f__Pseudomonadaceae</i>     | <i>g__Pseudomonas</i>        | <i>s__viridiflava</i>     |                                        |
| <i>p__Proteobacteria</i> |                          | <i>c__Gammmaproteobacteria</i> | <i>o__Xanthomonadales</i>   | <i>f__Xanthomonadaceae</i>     | <i>g__Stenotrophomonas</i>   | <i>s__</i>                |                                        |
| <i>p__Proteobacteria</i> |                          | <i>c__Alphaproteobacteria</i>  | <i>o__Rhizobiales</i>       |                                |                              |                           |                                        |
| Fanai (n=8)              | <i>p__Actinobacteria</i> | <i>c__Actinobacteria</i>       | <i>o__Actinomycetales</i>   | <i>f__Propionibacteriaceae</i> | <i>g__Propionibacterium</i>  | <i>s__acnes</i>           | 7                                      |
|                          | <i>p__Proteobacteria</i> | <i>c__Betaproteobacteria</i>   | <i>o__Burkholderiales</i>   | <i>f__Comamonadaceae</i>       | <i>g__Delftia</i>            | <i>s__</i>                |                                        |
|                          | <i>p__Proteobacteria</i> | <i>c__Gammmaproteobacteria</i> | <i>o__Pseudomonadales</i>   | <i>f__Moraxellaceae</i>        | <i>g__Enhydrobacter</i>      | <i>s__</i>                |                                        |
|                          | <i>p__Proteobacteria</i> | <i>c__Gammmaproteobacteria</i> | <i>o__Pseudomonadales</i>   | <i>f__Pseudomonadaceae</i>     | <i>g__Pseudomonas</i>        | <i>s__</i>                |                                        |

**Ranjit (n=8)**

|                          |                               |                             |                              |                         |            |
|--------------------------|-------------------------------|-----------------------------|------------------------------|-------------------------|------------|
| <i>p__Proteobacteria</i> | <i>c__Gammaproteobacteria</i> | <i>o__Enterobacteriales</i> | <i>f__Enterobacteriaceae</i> |                         |            |
| <i>p__Proteobacteria</i> | <i>c__Betaproteobacteria</i>  | <i>o__Burkholderiales</i>   | <i>f__Comamonadaceae</i>     | <i>g__Delftia</i>       | <i>s__</i> |
| <i>p__Proteobacteria</i> | <i>c__Gammaproteobacteria</i> | <i>o__Pseudomonadales</i>   | <i>f__Moraxellaceae</i>      | <i>g__Enhydrobacter</i> | <i>s__</i> |
| <i>p__Proteobacteria</i> | <i>c__Gammaproteobacteria</i> | <i>o__Pseudomonadales</i>   | <i>f__Pseudomonadaceae</i>   | <i>g__Pseudomonas</i>   |            |

|                  |                       |                       |                      |                        |                     |                |    |
|------------------|-----------------------|-----------------------|----------------------|------------------------|---------------------|----------------|----|
| Kalajoha (n=8)   | p_Actinobacteria      | c_Actinobacteria      | o_Bifidobacteriales  | f_Bifidobacteriaceae   | g_Bifidobacterium   | s_adolescentis | 27 |
|                  | p_Actinobacteria      | c_Actinobacteria      | o_Bifidobacteriales  | f_Bifidobacteriaceae   | g_Bifidobacterium   | s_             |    |
|                  | p_Actinobacteria      | c_Actinobacteria      | o_Actinomycetales    | f_Propionibacteriaceae | g_Propionibacterium | s_acnes        |    |
|                  | p_Firmicutes          | c_Clostridia          | o_Clostridiales      | f_Ruminococcaceae      | g_Faecalibacterium  | s_prausnitzii  |    |
|                  | p_Proteobacteria      | c_Gammaproteobacteria | o_Xanthomonadales    | f_Xanthomonadaceae     | g_                  | s_             |    |
|                  | p_Proteobacteria      | c_Gammaproteobacteria | o_Enterobacteriales  | f_Enterobacteriaceae   | g_                  | s_             |    |
|                  | p_Proteobacteria      | c_Betaproteobacteria  | o_Burkholderiales    | f_Alcaligenaceae       | g_                  | s_             |    |
|                  | p_Proteobacteria      | c_Betaproteobacteria  | o_Burkholderiales    | f_Alcaligenaceae       | g_Achromobacter     | s_             |    |
|                  | p_Proteobacteria      | c_Alphaproteobacteria | o_Rhizobiales        | f_Rhizobiaceae         | g_Agrobacterium     | s_             |    |
|                  | p_Proteobacteria      | c_Betaproteobacteria  | o_Burkholderiales    | f_Comamonadaceae       | g_Delftia           | s_             |    |
|                  | p_Proteobacteria      | c_Alphaproteobacteria | o_Rhizobiales        | f_Brucellaceae         | g_Ochrobactrum      | s_             |    |
|                  | p_Proteobacteria      | c_Gammaproteobacteria | o_Pseudomonadales    | f_Pseudomonadaceae     | g_Pseudomonas       | s_             |    |
|                  | p_Proteobacteria      | c_Gammaproteobacteria | o_Pseudomonadales    | f_Pseudomonadaceae     | g_Pseudomonas       | s_viridiflava  |    |
| p_Proteobacteria | c_Gammaproteobacteria | o_Xanthomonadales     | f_Xanthomonadaceae   | g_Stenotrophomonas     | s_                  |                |    |
| Maguri bao (n=8) | p_Actinobacteria      | c_Actinobacteria      | o_Bifidobacteriales  | f_Bifidobacteriaceae   | g_Bifidobacterium   | s_adolescentis | 34 |
|                  | p_Actinobacteria      | c_Actinobacteria      | o_Bifidobacteriales  | f_Bifidobacteriaceae   | g_Bifidobacterium   | s_             |    |
|                  | p_Actinobacteria      | c_Actinobacteria      | o_Actinomycetales    | f_Brevibacteriaceae    | g_Brevibacterium    | s_             |    |
|                  | p_Actinobacteria      | c_Actinobacteria      | o_Actinomycetales    | f_Corynebacteriaceae   | g_Corynebacterium   | s_             |    |
|                  | p_Actinobacteria      | c_Actinobacteria      | o_Actinomycetales    | f_Propionibacteriaceae | g_Propionibacterium | s_acnes        |    |
|                  | p_Proteobacteria      | c_Gammaproteobacteria | o_Xanthomonadales    | f_Xanthomonadaceae     | g_                  | s_             |    |
|                  | p_Proteobacteria      | c_Betaproteobacteria  | o_Burkholderiales    | f_Alcaligenaceae       | g_                  | s_             |    |
|                  | p_Proteobacteria      | c_Betaproteobacteria  | o_Burkholderiales    | f_Alcaligenaceae       | g_Achromobacter     | s_             |    |
|                  | p_Proteobacteria      | c_Alphaproteobacteria | o_Rhizobiales        | f_Rhizobiaceae         | g_Agrobacterium     | s_             |    |
|                  | p_Proteobacteria      | c_Betaproteobacteria  | o_Burkholderiales    | f_Comamonadaceae       | g_Delftia           | s_             |    |
|                  | p_Proteobacteria      | c_Gammaproteobacteria | o_Pseudomonadales    | f_Moraxellaceae        | g_Enhydrobacter     | s_             |    |
|                  | p_Proteobacteria      | c_Gammaproteobacteria | o_Enterobacteriales  | f_Enterobacteriaceae   | g_Erwinia           | s_             |    |
|                  | p_Proteobacteria      | c_Alphaproteobacteria | o_Rhizobiales        | f_Brucellaceae         | g_Ochrobactrum      | s_             |    |
| p_Proteobacteria | c_Gammaproteobacteria | o_Pseudomonadales     | f_Pseudomonadaceae   | g_Pseudomonas          | s_viridiflava       |                |    |
| p_Proteobacteria | c_Gammaproteobacteria | o_Pseudomonadales     | f_Pseudomonadaceae   | g_Pseudomonas          | s_                  |                |    |
| p_Proteobacteria | c_Gammaproteobacteria | o_Xanthomonadales     | f_Xanthomonadaceae   | g_Stenotrophomonas     | s_                  |                |    |
| p_Proteobacteria | c_Alphaproteobacteria | o_Rhizobiales         |                      |                        |                     |                |    |
| p_Proteobacteria | c_Gammaproteobacteria | o_Enterobacteriales   | f_Enterobacteriaceae |                        |                     |                |    |
| Kekua bao (n=8)  | p_Actinobacteria      | c_Actinobacteria      | o_Bifidobacteriales  | f_Bifidobacteriaceae   | g_Bifidobacterium   | s_adolescentis | 32 |
|                  | p_Actinobacteria      | c_Actinobacteria      | o_Bifidobacteriales  | f_Bifidobacteriaceae   | g_Bifidobacterium   | s_             |    |
|                  | p_Actinobacteria      | c_Actinobacteria      | o_Actinomycetales    | f_Corynebacteriaceae   | g_Corynebacterium   | s_             |    |
|                  | p_Actinobacteria      | c_Actinobacteria      | o_Actinomycetales    | f_Propionibacteriaceae | g_Propionibacterium | s_acnes        |    |
|                  | p_Firmicutes          | c_Clostridia          | o_Clostridiales      | f_Ruminococcaceae      | g_Faecalibacterium  | s_prausnitzii  |    |
|                  | p_Proteobacteria      | c_Gammaproteobacteria | o_Xanthomonadales    | f_Xanthomonadaceae     | g_                  | s_             |    |
|                  | p_Proteobacteria      | c_Betaproteobacteria  | o_Burkholderiales    | f_Alcaligenaceae       | g_                  | s_             |    |
|                  | p_Proteobacteria      | c_Betaproteobacteria  | o_Burkholderiales    | f_Alcaligenaceae       | g_Achromobacter     | s_             |    |
|                  | p_Proteobacteria      | c_Alphaproteobacteria | o_Rhizobiales        | f_Rhizobiaceae         | g_Agrobacterium     | s_             |    |
|                  | p_Proteobacteria      | c_Gammaproteobacteria | o_Pseudomonadales    | f_Moraxellaceae        | g_Enhydrobacter     | s_             |    |
|                  | p_Proteobacteria      | c_Gammaproteobacteria | o_Enterobacteriales  | f_Enterobacteriaceae   | g_Erwinia           | s_             |    |
|                  | p_Proteobacteria      | c_Alphaproteobacteria | o_Rhizobiales        | f_Brucellaceae         | g_Ochrobactrum      | s_             |    |
|                  | p_Proteobacteria      | c_Gammaproteobacteria | o_Pseudomonadales    | f_Pseudomonadaceae     | g_Pseudomonas       | s_             |    |
| p_Proteobacteria | c_Gammaproteobacteria | o_Pseudomonadales     | f_Pseudomonadaceae   | g_Pseudomonas          | s_viridiflava       |                |    |
| p_Proteobacteria | c_Gammaproteobacteria | o_Xanthomonadales     | f_Xanthomonadaceae   | g_Stenotrophomonas     | s_                  |                |    |
| p_Proteobacteria | c_Alphaproteobacteria | o_Rhizobiales         |                      |                        |                     |                |    |
| p_Proteobacteria | c_Gammaproteobacteria | o_Enterobacteriales   | f_Enterobacteriaceae |                        |                     |                |    |
